# Supplementary material
Source: Springer Nature journal article supplement (https://www.springermedizin.de/resource/supplementary/12933_2014_844_MOESM2_ESM.pdf/9539370)

## Baseline

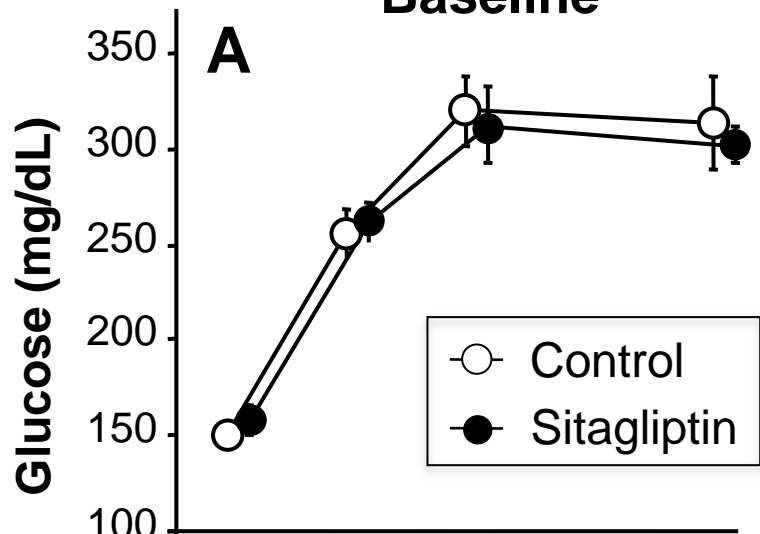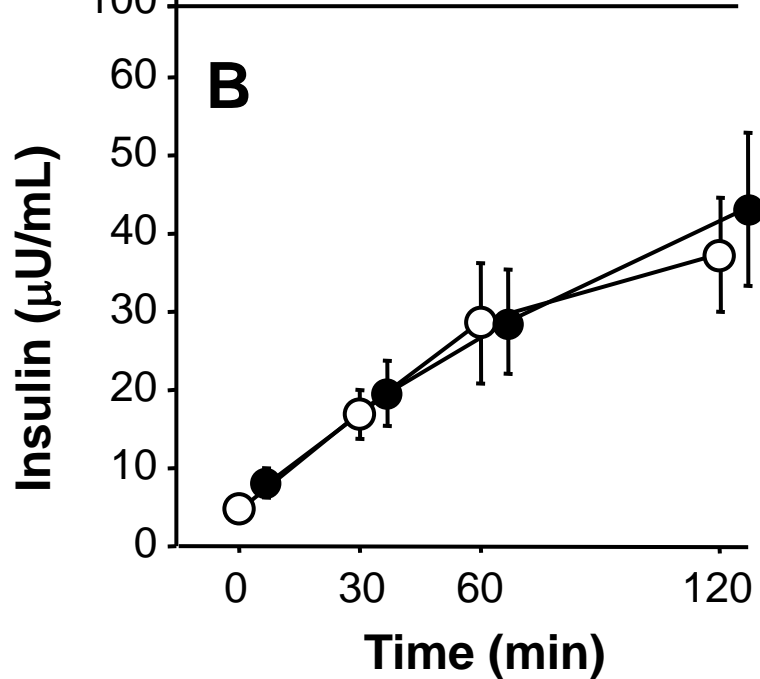

## After 3 months

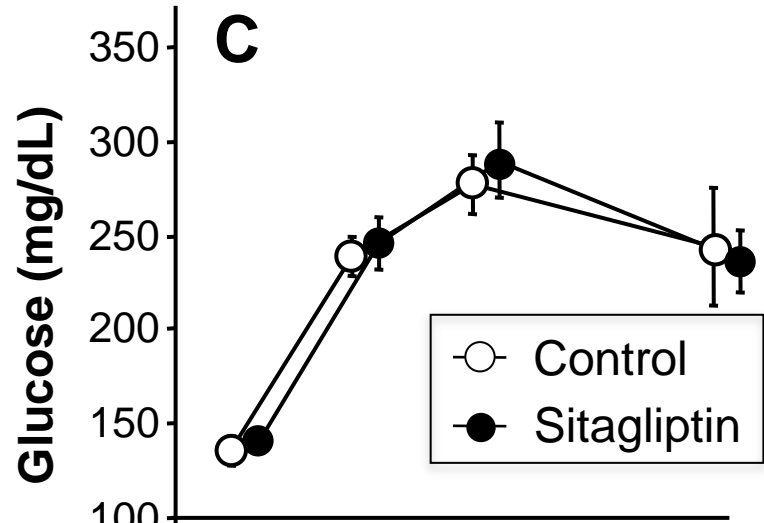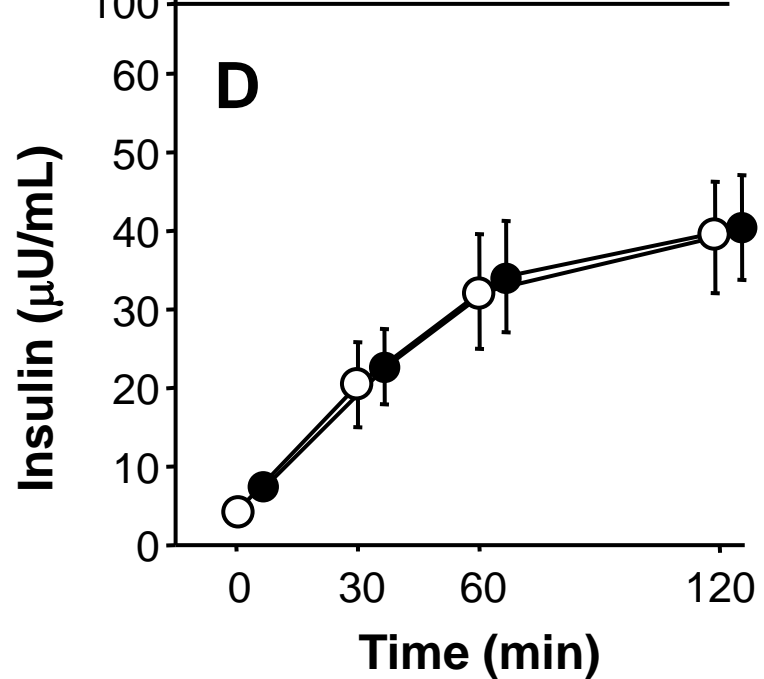

Supplement: MOESM2 [file 9539370]
